# Supplementary material for: Validity and reliability of a teledentistry survey among dental practitioners in Saudi Arabia
Source: PeerJ journal article supplement (doi:10.7717/peerj.16834), 2024-01-31
Supplement: QUESTIONNAIRE.pdf [file QUESTIONNAIRE.pdf]

# QUESTIONNAIRE

1. **Nationality:**
  - a. Saudi
  - b. Non-Saudi
2. **Age:**
  - a. 23–34 yr
  - b. 35–44 yr
  - c. 45–54 yr
  - d. 55–64 yr
  - e. > 65 yr
3. **Gender:**
  - a. Male
  - b. Female
4. **Qualification**
  - a. General Dental Practitioner
  - b. Dental Specialist
  - c. Dental consultant
5. **Years of work experience in dentistry:**
  - a. 1-5 yr
  - b. 6-10 yr
  - c. 11-15 yr
  - d. > 16 yr
6. **Work setting of main job:**
  - a. Private
  - b. Public
  - c. Both
7. **The average general use of internet (in hours/day) - use of Internet for purposes other than work:**
  - a. < 1 Hour
  - b. 2-4 Hour
  - c. 5-7 Hour
  - d. 8-10 Hour
  - e. >10 Hour
8. **The average work-related use of Internet (in hours/day) - Use of Internet for work purposes only:**
  - a. < 1 Hour
  - b. 2-4 Hour
  - c. 5-7 Hour
  - d. 8-10 Hour
  - e. >10 Hour
9. **How do you most commonly communicate with colleagues (e.g., other dentists or Specialists) - You can check more than one box if you wish.**
  - a. In person
  - b. Phone
  - c. E-mail
  - d. Social media
  - e. Videoconferencing
  - f. Forum

**10. On a scale of 1 (Strongly disagree) to 5 (Strongly agree) how would you agree with the following statements regarding dentists' perceptions of usefulness of teledentistry system:**

- Teledentistry would provide adequate diagnostic information.
- Teledentistry would be too expensive to set up.
- Teledentistry would save time compared with a referral letter.
- Teledentistry would necessitate an extra appointment for taking photographs.
- Teledentistry would increase surgery time spent with the patient.
- Teledentistry would reduce costs for the dental practices.
- Teledentistry would enhance clinical training and continuing education.

**11. On a scale of 1 (Strongly disagree) to 5 (Strongly agree) how would you agree with the following statements regarding dentists' perception of efficiency of teledentistry system:**

- Teledentistry would make referral of new patients more efficient.
- Teledentistry would improve communications between dentists (including dental therapists, GDP and consultants)
- Teledentistry would enhance guidance and advice.
- Teledentistry would help shorten waiting lists.
- Teledentistry diagnosis is accurate via assessment of intra-oral images as in traditional clinical setting.

**12. On a scale of 1 (Strongly disagree) to 5 (Strongly agree) how would you agree with the following statements regarding dentists' perception of benefits of teledentistry system for patients**

- Teledentistry would be useful for patients in distant or rural locations.
- Teledentistry would be convenient for patients and well received by patients.
- Teledentistry would be helpful to monitor a patient's condition.
- Teledentistry would help reduce unnecessary travel to hospital.
- Teledentistry would help with patient information and education.
- Teledentistry would improve interaction and communication with patients.
- Teledentistry would save money for patients.

**13. On a scale of 1 (Not concerned at all) to 5 (Very concerned) how concern you are with the following statements regarding dentists' concern about practice-related use of information technologies:**

- Reliability of Equipments
- Technical incompatibility
- Patient confidentiality when images are sent online to the hospital.
- Gaining patient consent for referral via email
- Potential for tampering with computer images

**THANK YOU!**
