# Supplementary material for: Validity and reliability of a teledentistry survey among dental practitioners in Saudi Arabia
Source: PeerJ. 2024 Jan 31;12:e16834. doi: 10.7717/peerj.16834 (PMC10838065; doi:10.7717/peerj.16834)
Supplement: Supplemental Information 2 [file peerj-12-16834-s002.xlsx]

## Sheet: Sheet1
Correlation Matrix
		Teledentistry would improve communications between dentists (including dental therapists, GDP and consultants)	Teledentistry would make referral of new patients more efficient	Teledentistry would enhance guidance and advice	Teledentistry would enhance clinical training and continuing education	Teledentistry would save time compared with a referral letter	Teledentistry would help with patient information and education	Teledentistry would provide adequate diagnostic information	Teledentistry would be helpful to monitor patient’s condition	Teledentistry would be useful for patients in distant or rural locations	Teledentistry would improve interaction and communication with patients	Teledentistry would reduce costs for the dental practices.	Teledentistry would save money for patients	Teledentistry would help reduce unnecessary travel to hospital	Teledentistry would be convenient for patients and well received by patients	Teledentistry would help shorten waiting lists	Teledentistry would increase surgery time spent with the patient	Teledentistry would necessitate an extra appointment for taking photographs	Teledentistry would be too expensive to set up	Teledentistry diagnosis is accurate via assessment of intra-oral images as in traditional clinical setting	Technical incompatibility	Reliability of Equipments	Patient confidentiality when images are sent online to the hospital	Potential for tampering with computer images	Gaining patient consent for referrals via email
Correlation	Teledentistry would improve communications between dentists (including dental therapists, GDP and consultants)	1	0.482782	0.492422	0.447482	0.454202	0.395827	0.330274	0.383393	0.455509	0.389956	0.137291	0.249487	0.407536	0.269554	0.340158	0.0475137	0.0958402	0.0191579	0.163822	0.0288952	0.288859	0.250222	0.185784	0.0288952
	Teledentistry would make referral of new patients more efficient	0.482782	1	0.462195	0.426315	0.442949	0.357862	0.430502	0.387383	0.394354	0.370562	0.265804	0.229205	0.359189	0.302094	0.344459	0.134243	0.163938	0.0649993	0.170094	0.0310818	0.336088	0.166455	0.0961776	0.0310818
	Teledentistry would enhance guidance and advice	0.492422	0.462195	1	0.399598	0.438298	0.390534	0.258083	0.302398	0.376771	0.392809	0.172932	0.188092	0.337165	0.309379	0.356465	0.104665	0.13642	-0.0170986	0.245049	0.1176	0.30645	0.151818	0.0935339	0.1176
	Teledentistry would enhance clinical training and continuing education	0.447482	0.426315	0.399598	1	0.408099	0.319634	0.409338	0.31496	0.372591	0.300039	0.197352	0.174491	0.330518	0.294489	0.263399	0.102168	0.141291	0.0791373	0.199107	0.0704317	0.301516	0.153614	0.141478	0.0704317
	Teledentistry would save time compared with a referral letter	0.454202	0.442949	0.438298	0.408099	1	0.381473	0.420271	0.320604	0.385177	0.369195	0.231144	0.240885	0.351528	0.239261	0.338088	0.160265	0.178877	0.0382709	0.239033	0.0543354	0.274409	0.166565	0.075012	0.0543354
	Teledentistry would help with patient information and education	0.395827	0.357862	0.390534	0.319634	0.381473	1	0.3159	0.442327	0.406434	0.388481	0.212856	0.221726	0.371177	0.300927	0.360275	0.0563071	0.116426	-0.045468	0.161592	0.111403	0.381385	0.13319	0.075304	0.111403
	Teledentistry would provide adequate diagnostic information	0.330274	0.430502	0.258083	0.409338	0.420271	0.3159	1	0.294945	0.350881	0.32844	0.261053	0.19568	0.290635	0.319534	0.211773	0.191493	0.105897	0.110753	0.309236	0.0388159	0.388122	0.212919	0.0534601	0.0388159
	Teledentistry would be helpful to monitor patient’s condition	0.383393	0.387383	0.302398	0.31496	0.320604	0.442327	0.294945	1	0.43912	0.349292	0.149605	0.237007	0.287953	0.320975	0.304673	0.0657796	0.247412	0.0319031	0.224652	0.0516828	0.302135	0.155203	0.0454902	0.0516828
	Teledentistry would be useful for patients in distant or rural locations	0.455509	0.394354	0.376771	0.372591	0.385177	0.406434	0.350881	0.43912	1	0.325446	0.242577	0.331738	0.395739	0.399243	0.412254	0.136362	0.106158	-0.0566857	0.197306	0.0847601	0.324738	0.187832	0.0958538	0.0847601
	Teledentistry would improve interaction and communication with patients	0.389956	0.370562	0.392809	0.300039	0.369195	0.388481	0.32844	0.349292	0.325446	1	0.226698	0.249475	0.331607	0.380906	0.293962	0.108259	0.166914	0.0307086	0.224709	0.0541623	0.330532	0.201287	0.0502515	0.0541623
	Teledentistry would reduce costs for the dental practices.	0.137291	0.265804	0.172932	0.197352	0.231144	0.212856	0.261053	0.149605	0.242577	0.226698	1	0.316365	0.332473	0.307256	0.297804	0.263235	0.209808	0.0136098	0.257053	0.0506404	0.263457	0.0619777	-0.0259187	0.0506404
	Teledentistry would save money for patients	0.249487	0.229205	0.188092	0.174491	0.240885	0.221726	0.19568	0.237007	0.331738	0.249475	0.316365	1	0.324764	0.229625	0.319721	0.0505791	0.0745875	0.00394333	0.112812	0.103466	0.176118	0.201896	0.154918	0.103466
	Teledentistry would help reduce unnecessary travel to hospital	0.407536	0.359189	0.337165	0.330518	0.351528	0.371177	0.290635	0.287953	0.395739	0.331607	0.332473	0.324764	1	0.399907	0.306708	0.105946	0.115551	0.0392774	0.208318	0.125009	0.309184	0.192783	0.103113	0.125009
	Teledentistry would be convenient for patients and well received by patients	0.269554	0.302094	0.309379	0.294489	0.239261	0.300927	0.319534	0.320975	0.399243	0.380906	0.307256	0.229625	0.399907	1	0.346121	0.141177	0.187498	0.025911	0.356629	0.168296	0.295779	0.202049	0.108943	0.168296
	Teledentistry would help shorten waiting lists	0.340158	0.344459	0.356465	0.263399	0.338088	0.360275	0.211773	0.304673	0.412254	0.293962	0.297804	0.319721	0.306708	0.346121	1	0.116535	0.0869487	-0.00928654	0.252373	0.0829215	0.299234	0.114622	0.00571779	0.0829215
	Teledentistry would increase surgery time spent with the patient	0.0475137	0.134243	0.104665	0.102168	0.160265	0.0563071	0.191493	0.0657796	0.136362	0.108259	0.263235	0.0505791	0.105946	0.141177	0.116535	1	0.38055	0.19229	0.196013	-0.0516929	0.178863	-0.0549952	-0.176646	-0.0516929
	Teledentistry would necessitate an extra appointment for taking photographs	0.0958402	0.163938	0.13642	0.141291	0.178877	0.116426	0.105897	0.247412	0.106158	0.166914	0.209808	0.0745875	0.115551	0.187498	0.0869487	0.38055	1	0.168334	0.209338	-0.0123302	0.132126	-0.0296318	-0.0856507	-0.0123302
	Teledentistry would be too expensive to set up	0.0191579	0.0649993	-0.0170986	0.0791373	0.0382709	-0.045468	0.110753	0.0319031	-0.0566857	0.0307086	0.0136098	0.00394333	0.0392774	0.025911	-0.00928654	0.19229	0.168334	1	0.135993	0.0833818	0.0571766	0.00800186	-0.0046025	0.0833818
	Teledentistry diagnosis is accurate via assessment of intra-oral images as in traditional clinical setting	0.163822	0.170094	0.245049	0.199107	0.239033	0.161592	0.309236	0.224652	0.197306	0.224709	0.257053	0.112812	0.208318	0.356629	0.252373	0.196013	0.209338	0.135993	1	0.0214323	0.164704	0.0336728	-0.136842	0.0214323
	Technical incompatibility	0.0288952	0.0310818	0.1176	0.0704317	0.0543354	0.111403	0.0388159	0.0516828	0.0847601	0.0541623	0.0506404	0.103466	0.125009	0.168296	0.0829215	-0.0516929	-0.0123302	0.0833818	0.0214323	1	0.259317	0.251048	0.261985	0.259317
	Reliability of Equipments	0.288859	0.336088	0.30645	0.301516	0.274409	0.381385	0.388122	0.302135	0.324738	0.330532	0.263457	0.176118	0.309184	0.295779	0.299234	0.178863	0.132126	0.0571766	0.164704	0.259317	1	0.188653	0.126514	0.251048
	Patient confidentiality when images are sent online to the hospital	0.250222	0.166455	0.151818	0.153614	0.166565	0.13319	0.212919	0.155203	0.187832	0.201287	0.0619777	0.201896	0.192783	0.202049	0.114622	-0.0549952	-0.0296318	0.00800186	0.0336728	0.251048	0.188653	1	0.420039	0.261985
	Potential for tampering with computer images	0.185784	0.0961776	0.0935339	0.141478	0.075012	0.075304	0.0534601	0.0454902	0.0958538	0.0502515	-0.0259187	0.154918	0.103113	0.108943	0.00571779	-0.176646	-0.0856507	-0.0046025	-0.136842	0.261985	0.126514	0.420039	1	0.021
	Gaining patient consent for referrals via email	0.0288952	0.0310818	0.1176	0.0704317	0.0543354	0.111403	0.0388159	0.0516828	0.0847601	0.0541623	0.0506404	0.103466	0.125009	0.168296	0.0829215	-0.0516929	-0.0123302	0.0833818	0.0214323	0.021	0.259317	0.251048	0.261985	1
